# Supplementary material for: NLO-active Y-shaped ferrocene conjugated imidazole chromophores as precursors for SHG polymeric films
Source: Royal Society of Chemistry journal article supplement (doi:10.1039/c9dt03637g), 2020-01-01

**Electronic Supplementary Information (ESI)**

**NLO-active Y-shaped ferrocene conjugated imidazole chromophores as precursors  
for SHG polymeric films**

Selvam Prabu,<sup>a</sup> Ezhumalai David,<sup>a</sup> Thamodharan Viswanathan,<sup>a</sup> Krishnan Thirumoorthy,<sup>a</sup> Tamas Panda,<sup>a</sup> Claudia Dragonetti,<sup>\*b,c</sup> Alessia Colombo,<sup>b,c</sup> Daniele Marinotto,<sup>b,c</sup> Stefania Righetto,<sup>b</sup> Dominique Roberto<sup>b,c</sup> and Nallasamy Palanisami<sup>a\*</sup>

- a. Department of Chemistry, School of Advanced Sciences, Vellore Institute of Technology, Vellore 632014, Tamilnadu, India.
- b. Department of Chemistry and Centro CIMAINA, University of Milan, INSTM-Research Unit, Via C. Golgi 19, 20133 Milan, Italy.
- c. ISTM-CNR via Golgi 19 Milan, Italy.

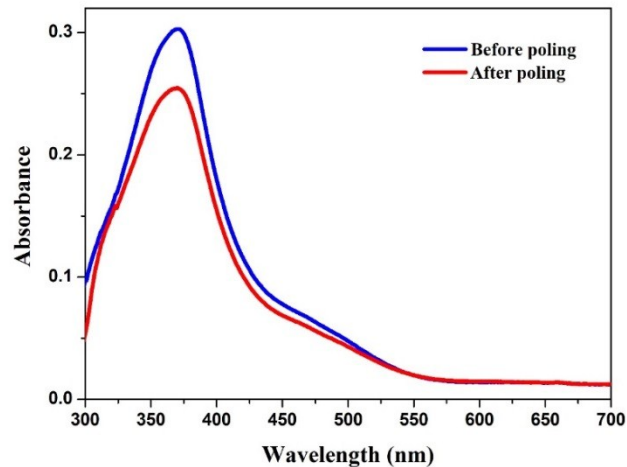

Figure S1. Absorption spectra of a PMMA film containing compound 3 before and after poling

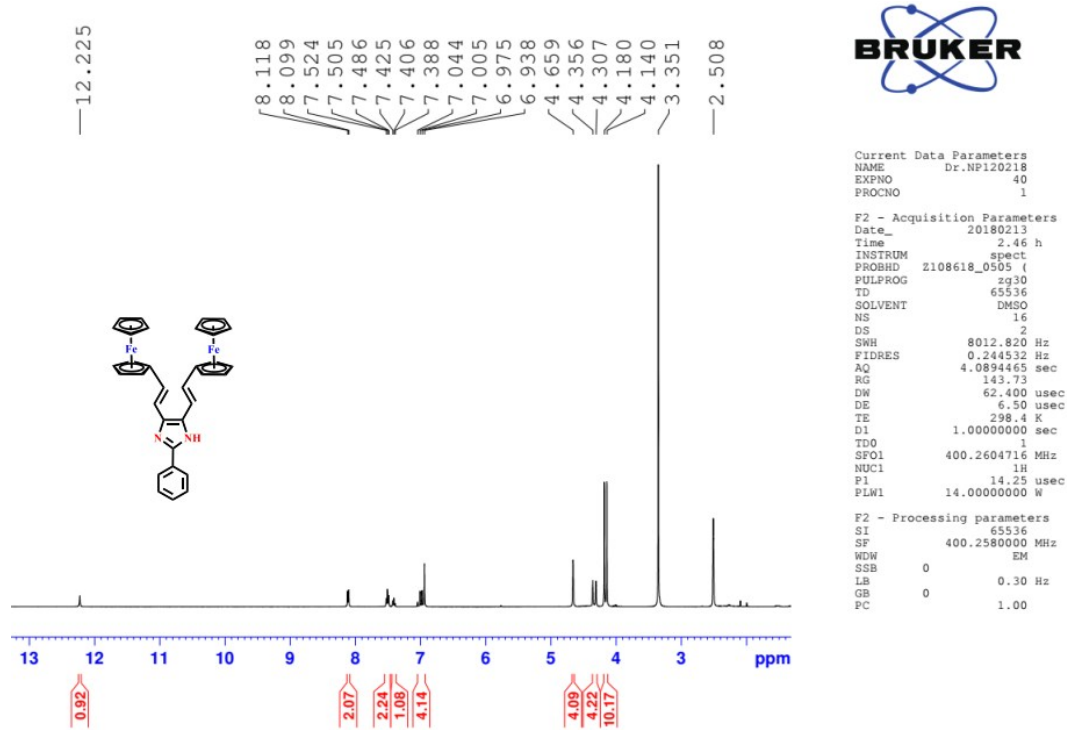

Figure S2. <sup>1</sup>H NMR spectrum of compound 1(H) in DMSO-d<sub>6</sub> at 25 °C

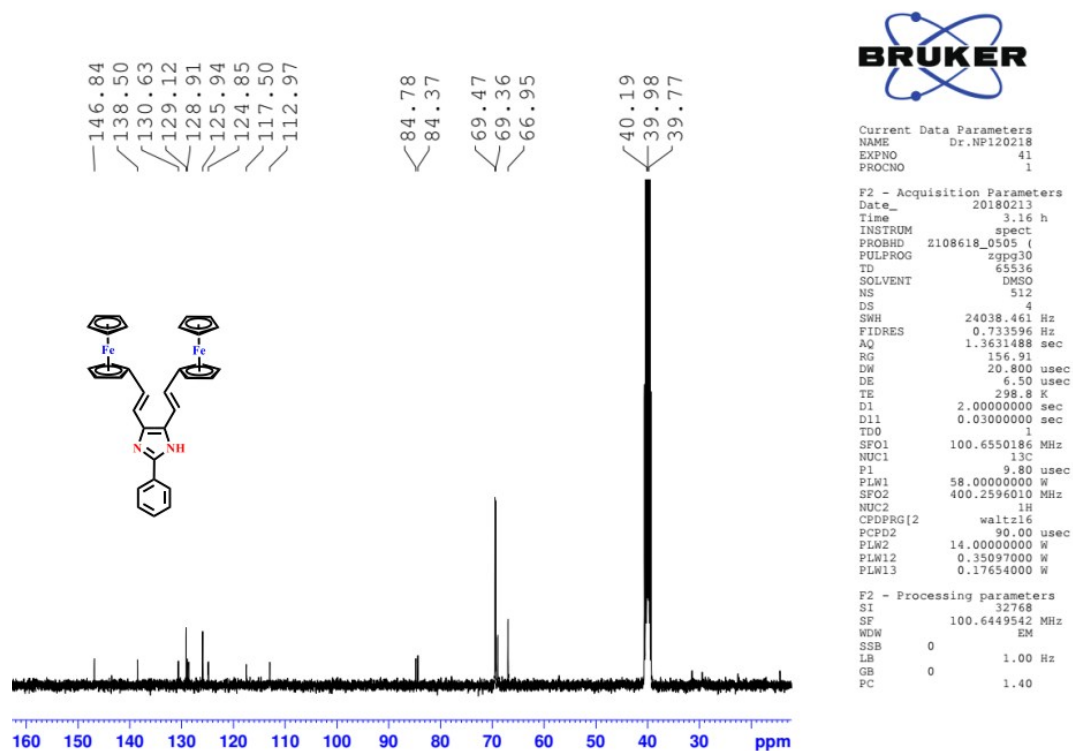

Figure S3. <sup>13</sup>C NMR spectrum of compound 1(H) in DMSO-d<sub>6</sub> at 25 °C

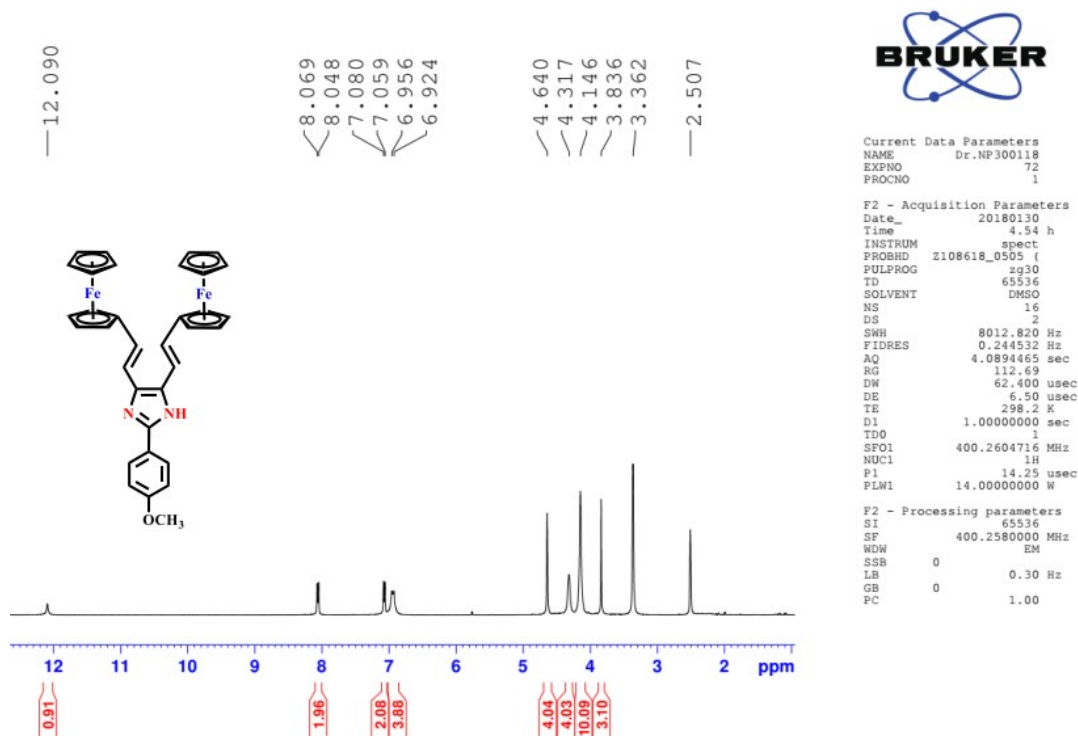

Figure S4. <sup>1</sup>H NMR spectrum of compound 2(OCH<sub>3</sub>) in DMSO-d<sub>6</sub> at 25 °C

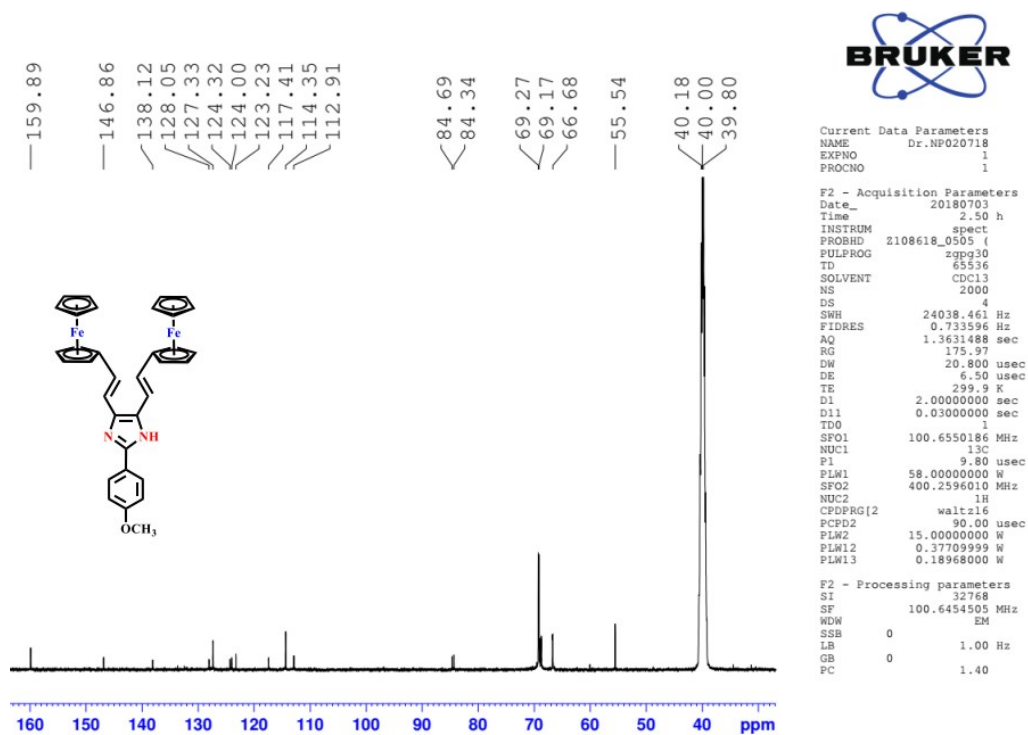

Figure S5.  $^{13}\text{C}$  NMR spectrum of compound 2(OCH<sub>3</sub>) in DMSO-d<sub>6</sub> at 25 °C

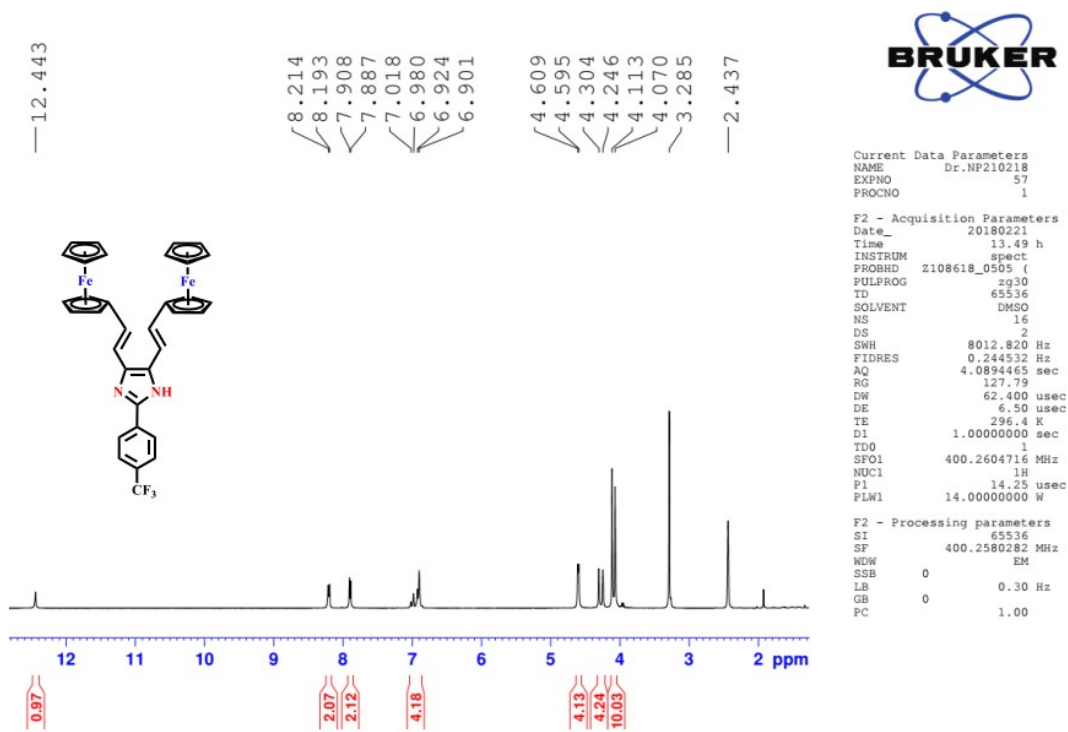

Figure S6.  $^1\text{H}$  NMR spectrum of compound 3(CF<sub>3</sub>) in DMSO-d<sub>6</sub> at 25 °C

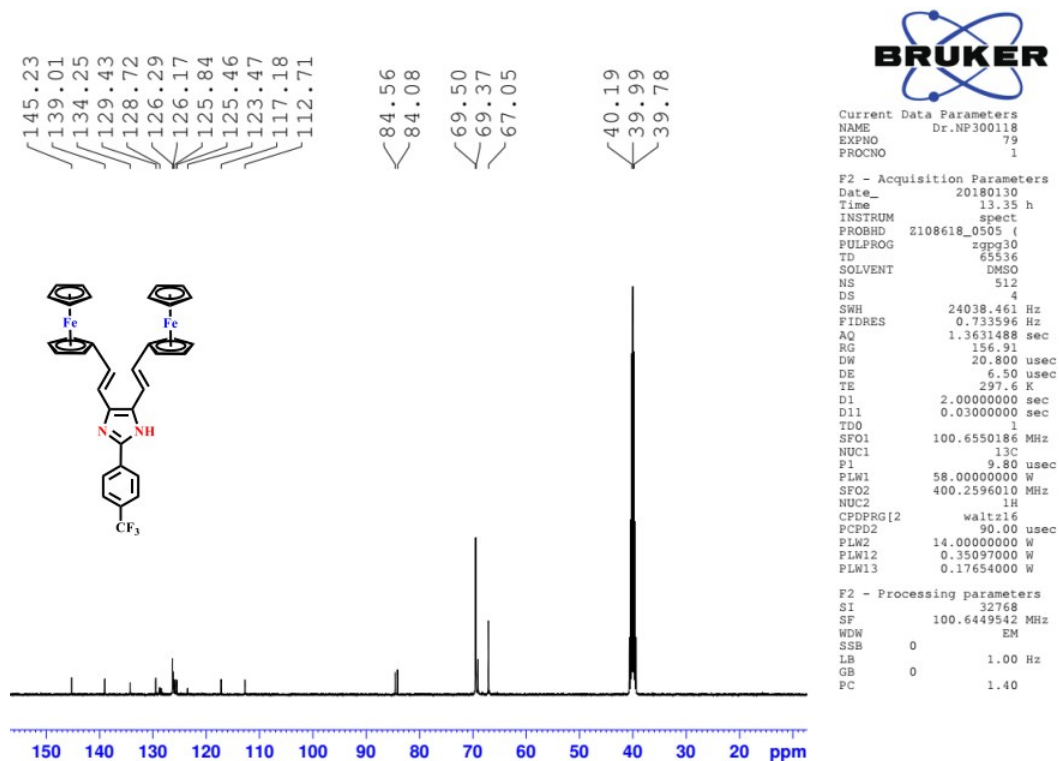

Figure S7.  $^{13}\text{C}$  NMR spectrum of compound 3(CF<sub>3</sub>) in DMSO-d<sub>6</sub> at 25 °C

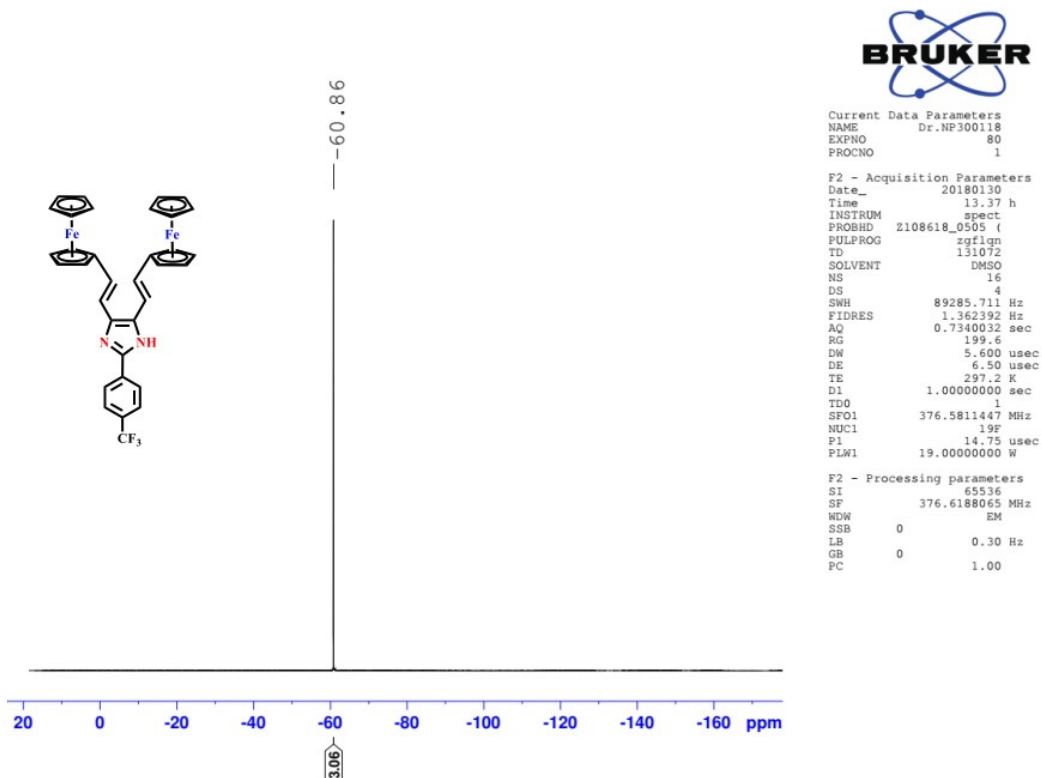

Figure S8.  $^{19}\text{F}$  NMR spectrum of compound 3(CF<sub>3</sub>) in DMSO-d<sub>6</sub> at 25 °C

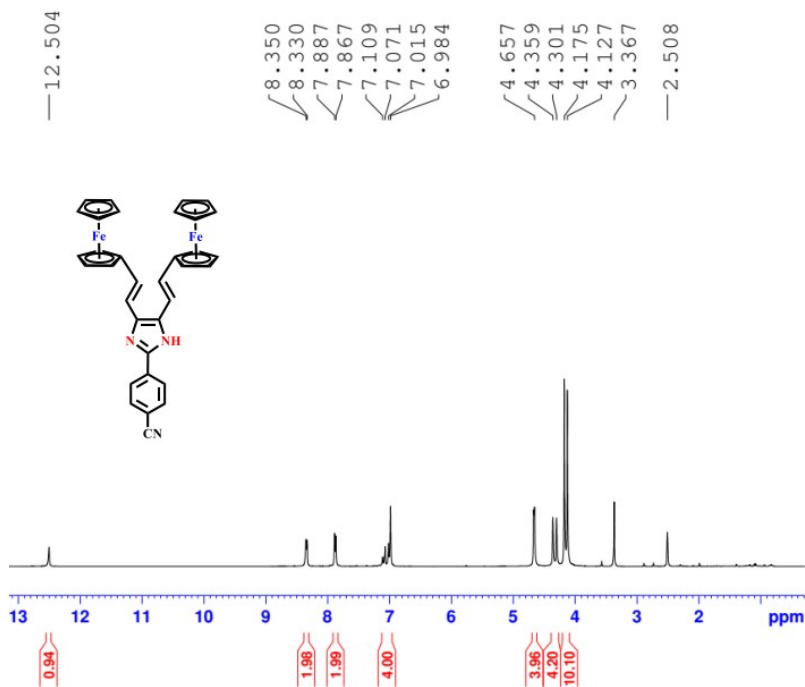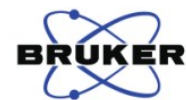

Current Data Parameters  
 NAME Dr.NP300118  
 EXPNO 78  
 PROCNO 1

F2 - Acquisition Parameters  
 Date\_ 20180130  
 Time 13.05 h  
 INSTRUM spect  
 PROBHD Z108618\_0505 (4  
 PULPROG zg30  
 TD 65536  
 SOLVENT DMSO  
 NS 16  
 DS 2  
 SWH 8012.820 Hz  
 FIDRES 0.244532 Hz  
 AQ 4.0894465 sec  
 RG 71.13  
 DW 62.400 usec  
 DE 6.50 usec  
 TE 297.4 K  
 D1 1.00000000 sec  
 TDO 1  
 SFO1 400.2604716 MHz  
 NUC1 1H  
 P1 14.25 usec  
 PLW1 14.00000000 W

F2 - Processing parameters  
 SI 65536  
 SF 400.2580000 MHz  
 WDW EM  
 SSB 0  
 LB 0.30 Hz  
 GB 0  
 PC 1.00

Figure S9. <sup>1</sup>H NMR spectrum of compound 4(CN) in DMSO-d<sub>6</sub> at 25 °C

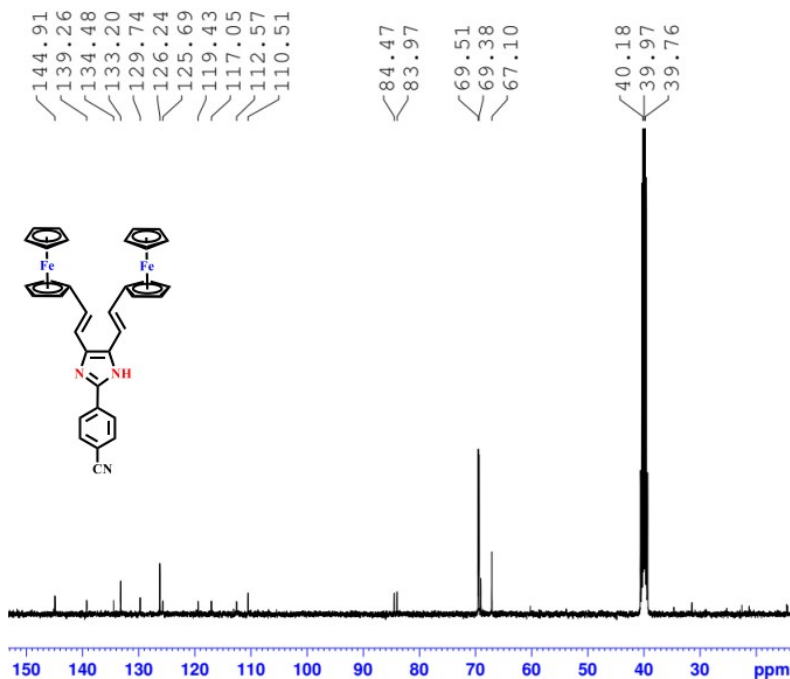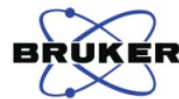

Current Data Parameters  
 NAME Dr.NP210218  
 EXPNO 58  
 PROCNO 1

F2 - Acquisition Parameters  
 Date\_ 20180221  
 Time 14.19 h  
 INSTRUM spect  
 PROBHD Z108618\_0505 (4  
 PULPROG zgpg30  
 TD 65536  
 SOLVENT DMSO  
 NS 512  
 DS 4  
 SWH 24038.461 Hz  
 FIDRES 0.733596 Hz  
 AQ 1.3631488 sec  
 RG 77.73  
 DW 20.800 usec  
 DE 6.50 usec  
 TE 297.0 K  
 D1 2.00000000 sec  
 D11 0.03000000 sec  
 TDO 1  
 SFO1 100.6550186 MHz  
 NUC1 13C  
 P1 9.80 usec  
 PLW1 58.00000000 W  
 SFO2 400.2596010 MHz  
 NUC2 1H  
 CPDPRG[2] waltz16  
 PCPD2 90.00 usec  
 PLW2 14.00000000 W  
 PLW12 0.35097000 W  
 PLW13 0.17654000 W

F2 - Processing parameters  
 SI 32768  
 SF 100.6449542 MHz  
 WDW EM  
 SSB 0  
 LB 1.00 Hz  
 GB 0  
 PC 1.40

Figure S10. <sup>13</sup>C NMR spectrum of compound 4(CN) in DMSO-d<sub>6</sub> at 25 °C

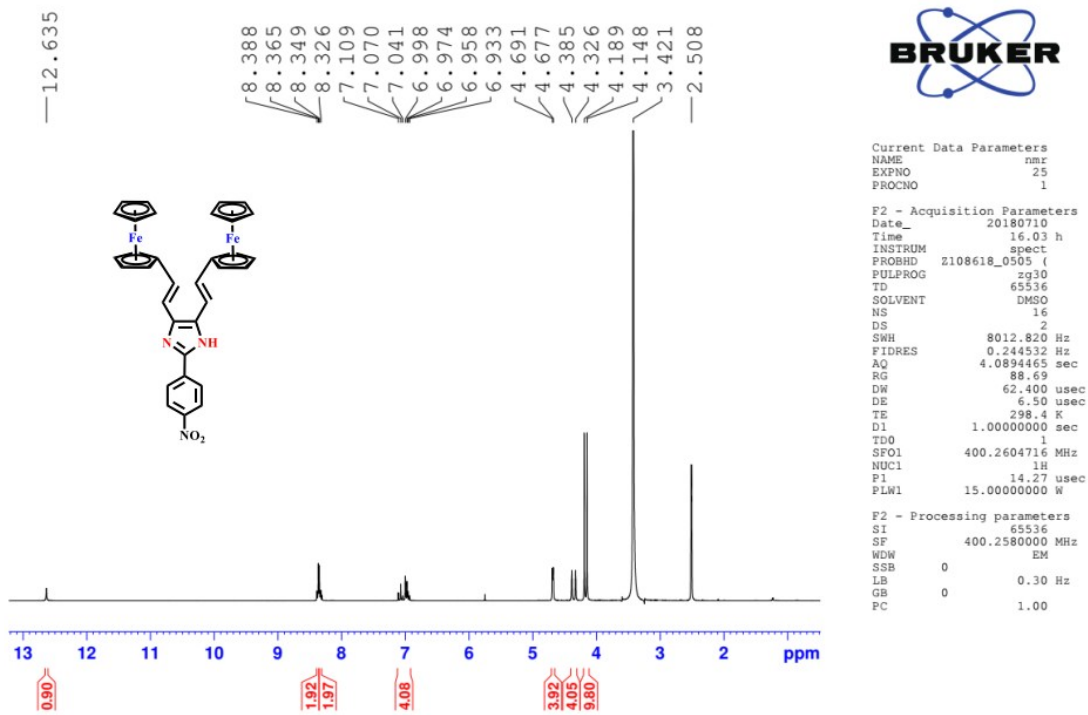

Figure S11. <sup>1</sup>H NMR spectrum of compound 5(NO<sub>2</sub>) in DMSO-d<sub>6</sub> at 25 °C

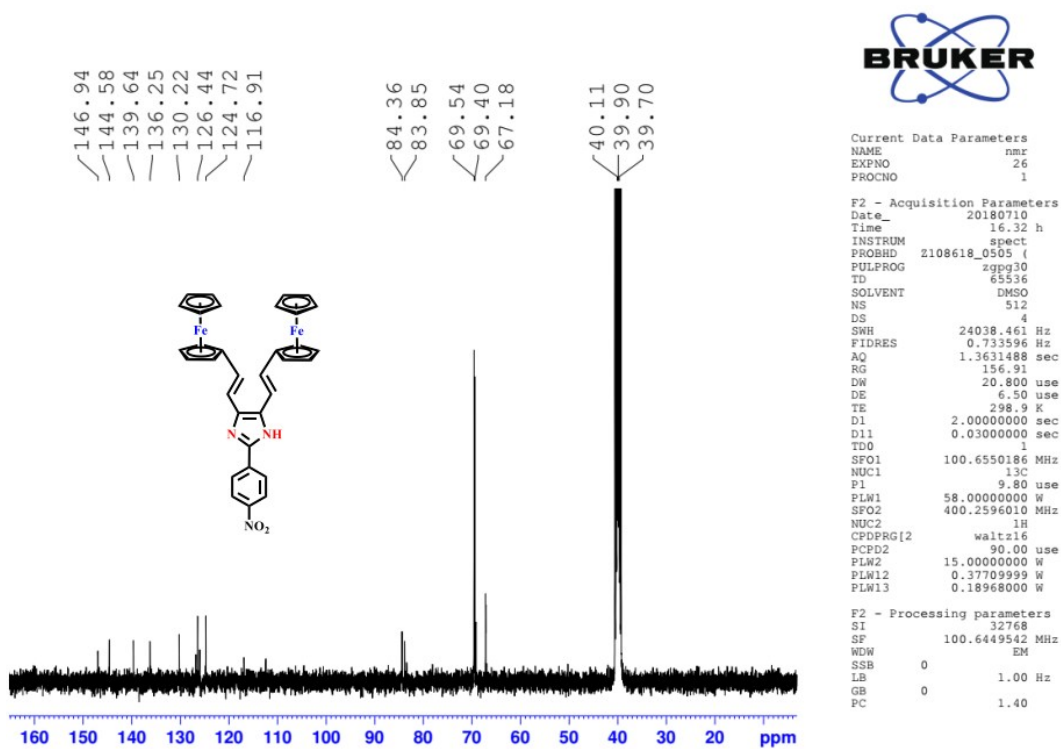

Figure S12. <sup>13</sup>C NMR spectrum of compound 5(NO<sub>2</sub>) in DMSO-d<sub>6</sub> at 25 °C

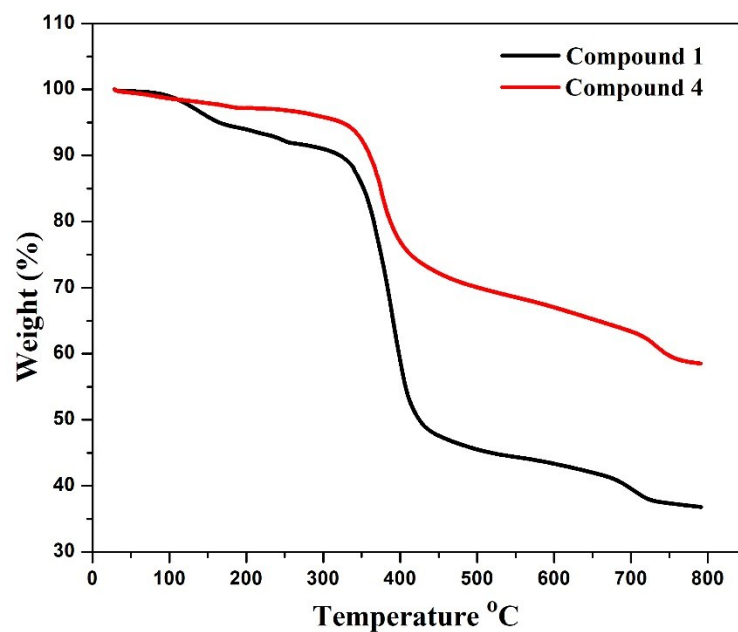

Figure S13. TGA curve of compounds 1(H) and 4(CN)

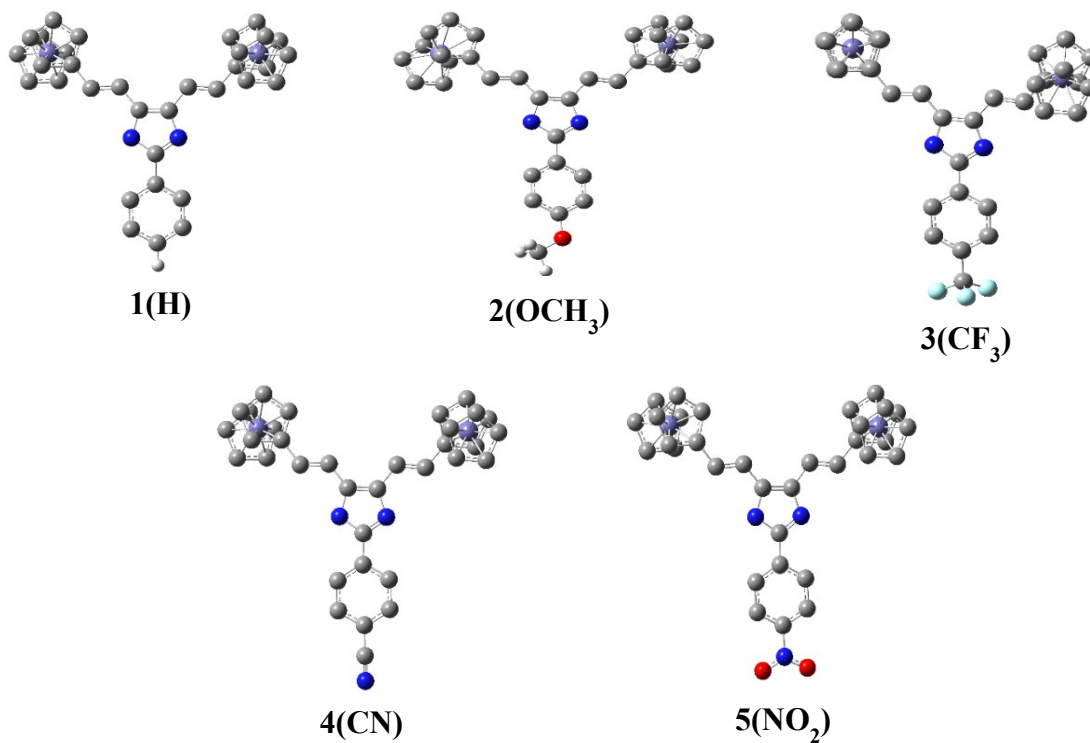

Figure S14. The optimized geometries of chromophores 1-5 obtained at B3LYP/6-31+G\*\* level of theory



SMP-15

Scan: 30 TIC=26210416 Base=100%FS #ions=878 RT=.73

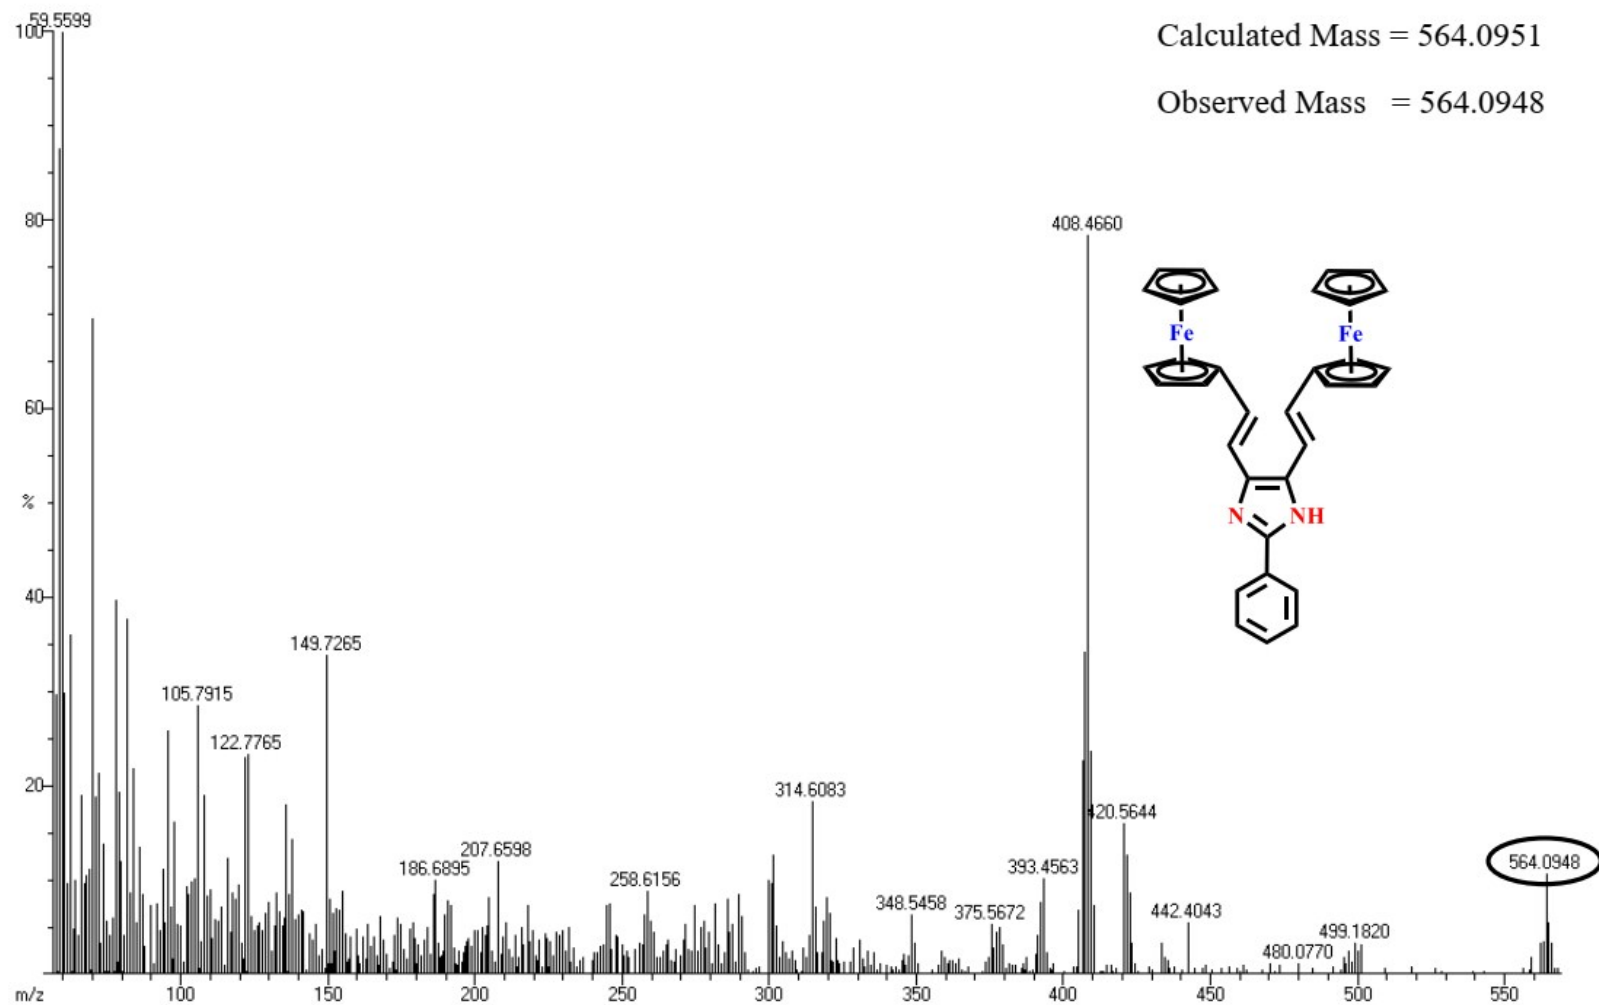

Figure S15. HRMS (EI) spectrum of compound 1(H)

SMP6

Scan: 10 TIC=6548141 Base=99.8%FS #Ions=269 RT=23

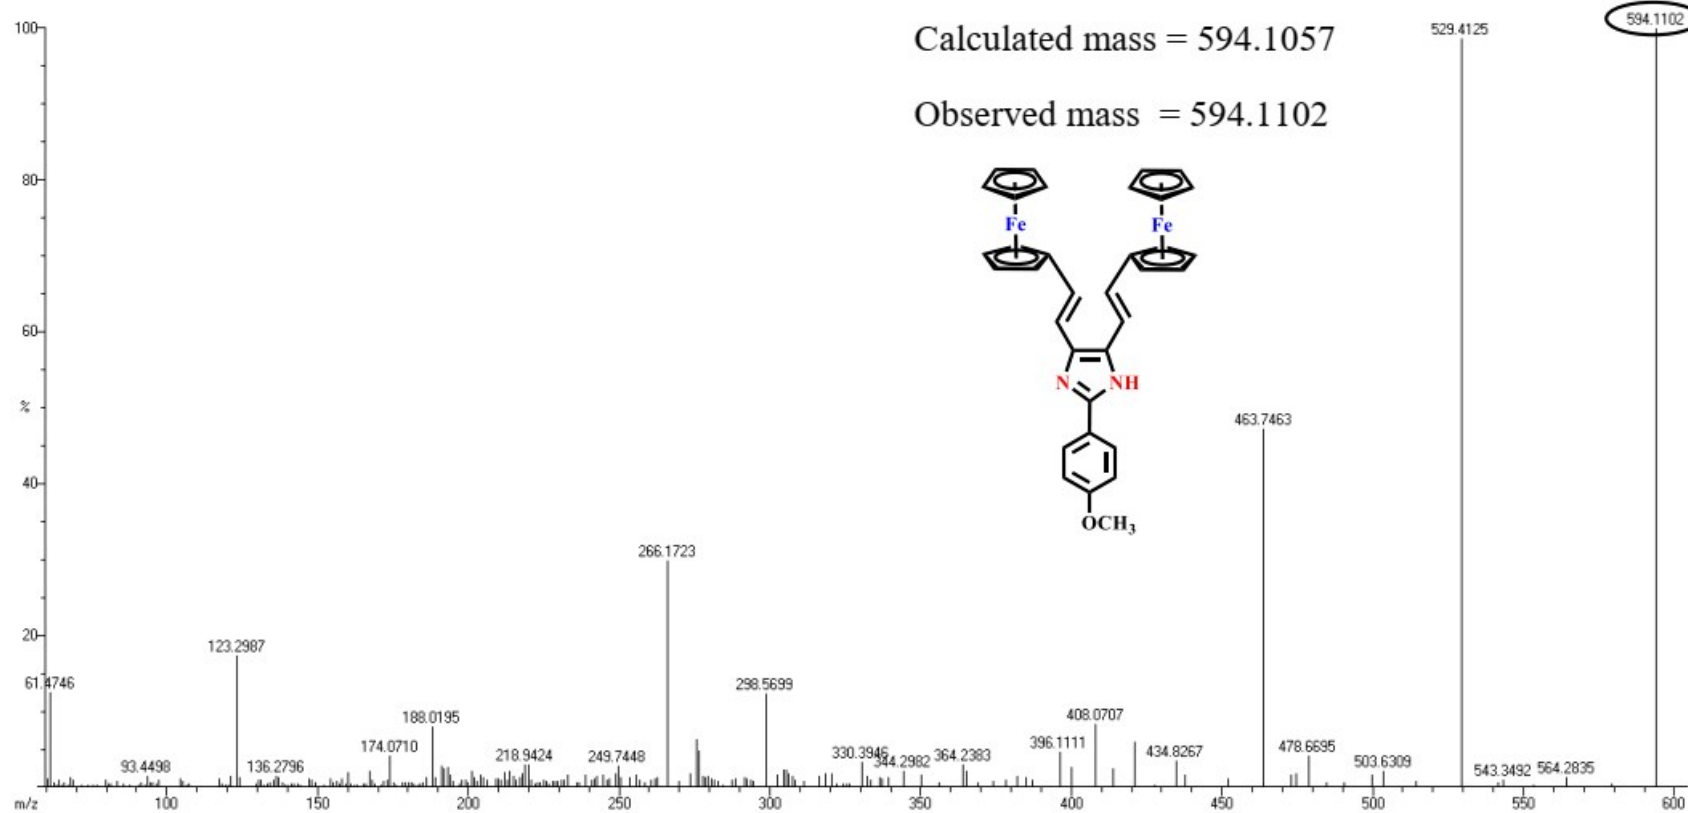

Figure S16. HRMS (EI) spectrum of compound 2(OCH<sub>3</sub>)

SMP8

Scan: 2 TIC=2073705 Base=42.5%FS #Ions=425 RT=.03

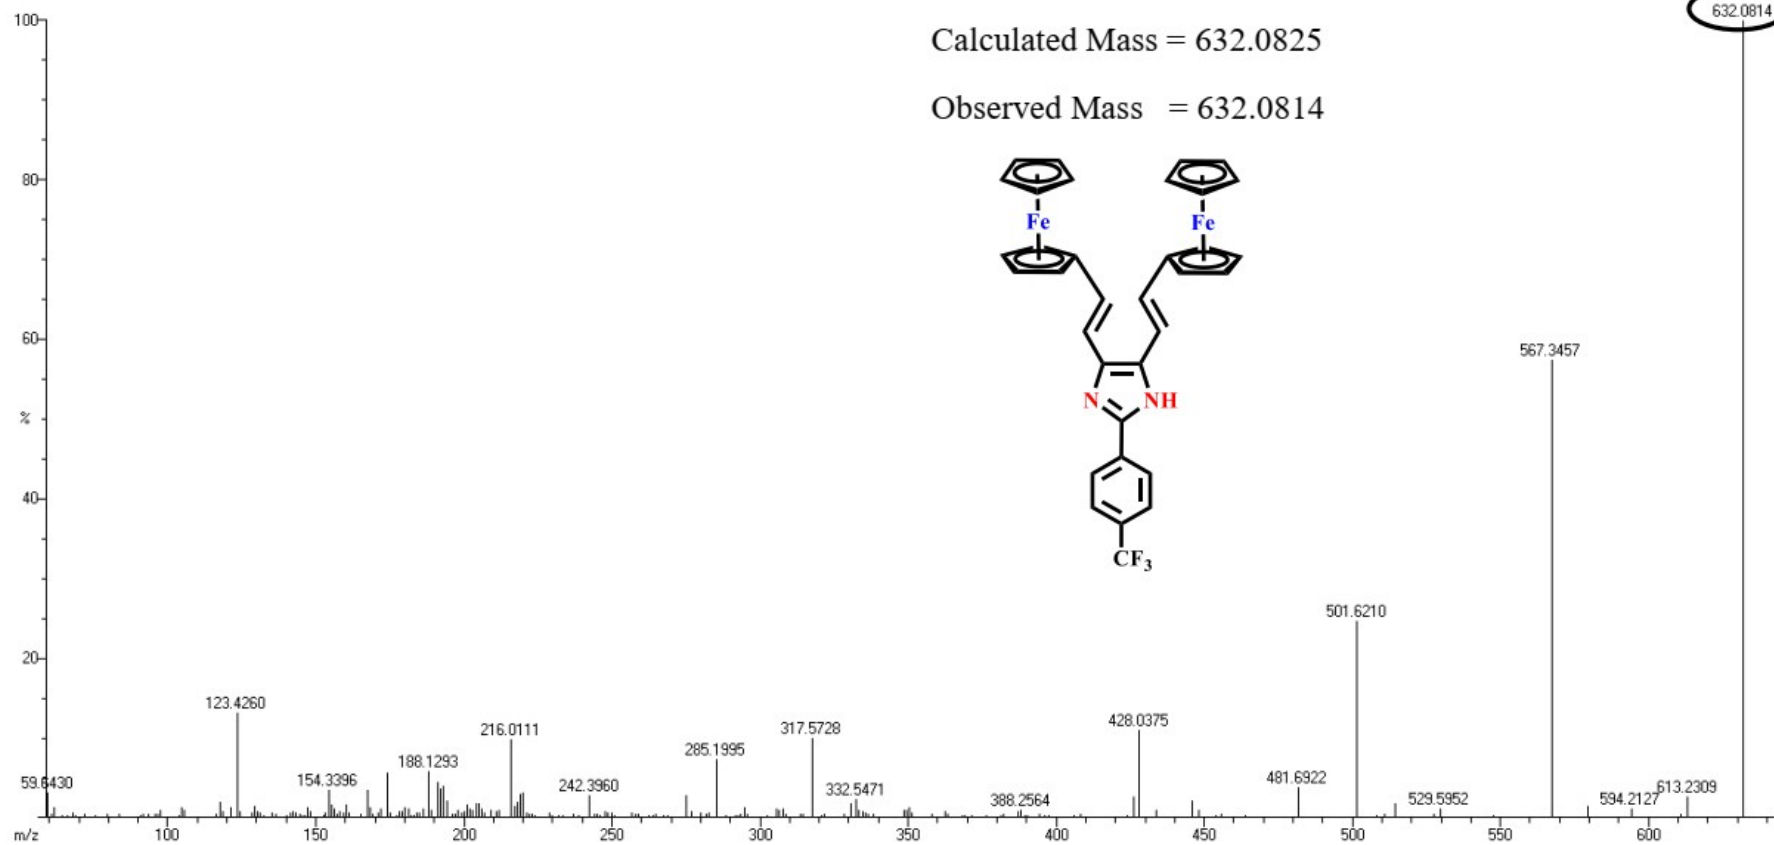

Figure S17. HRMS (EI) spectrum of compound 3(CF<sub>3</sub>)

SMP9

Scan: 4 TIC=1631397 Base=35.5%FS #Ions=469 RT=08

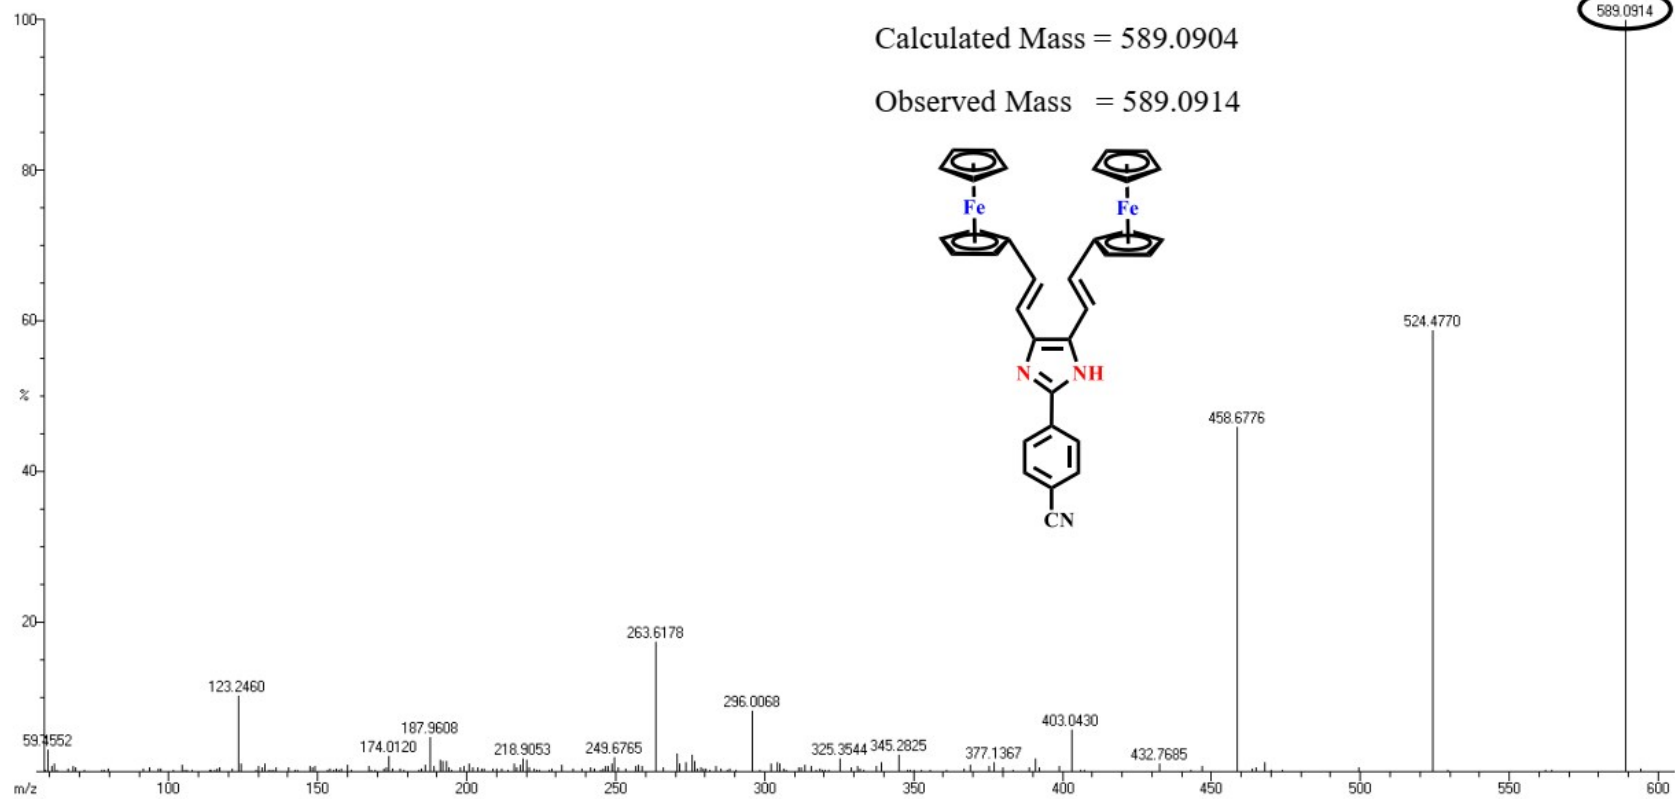

Figure S18. HRMS (EI) spectrum of compound 4(CN)

SMP7

Scan: 10 TIC=6216397 Base=65.4%FS #Ions=285 RT=.23

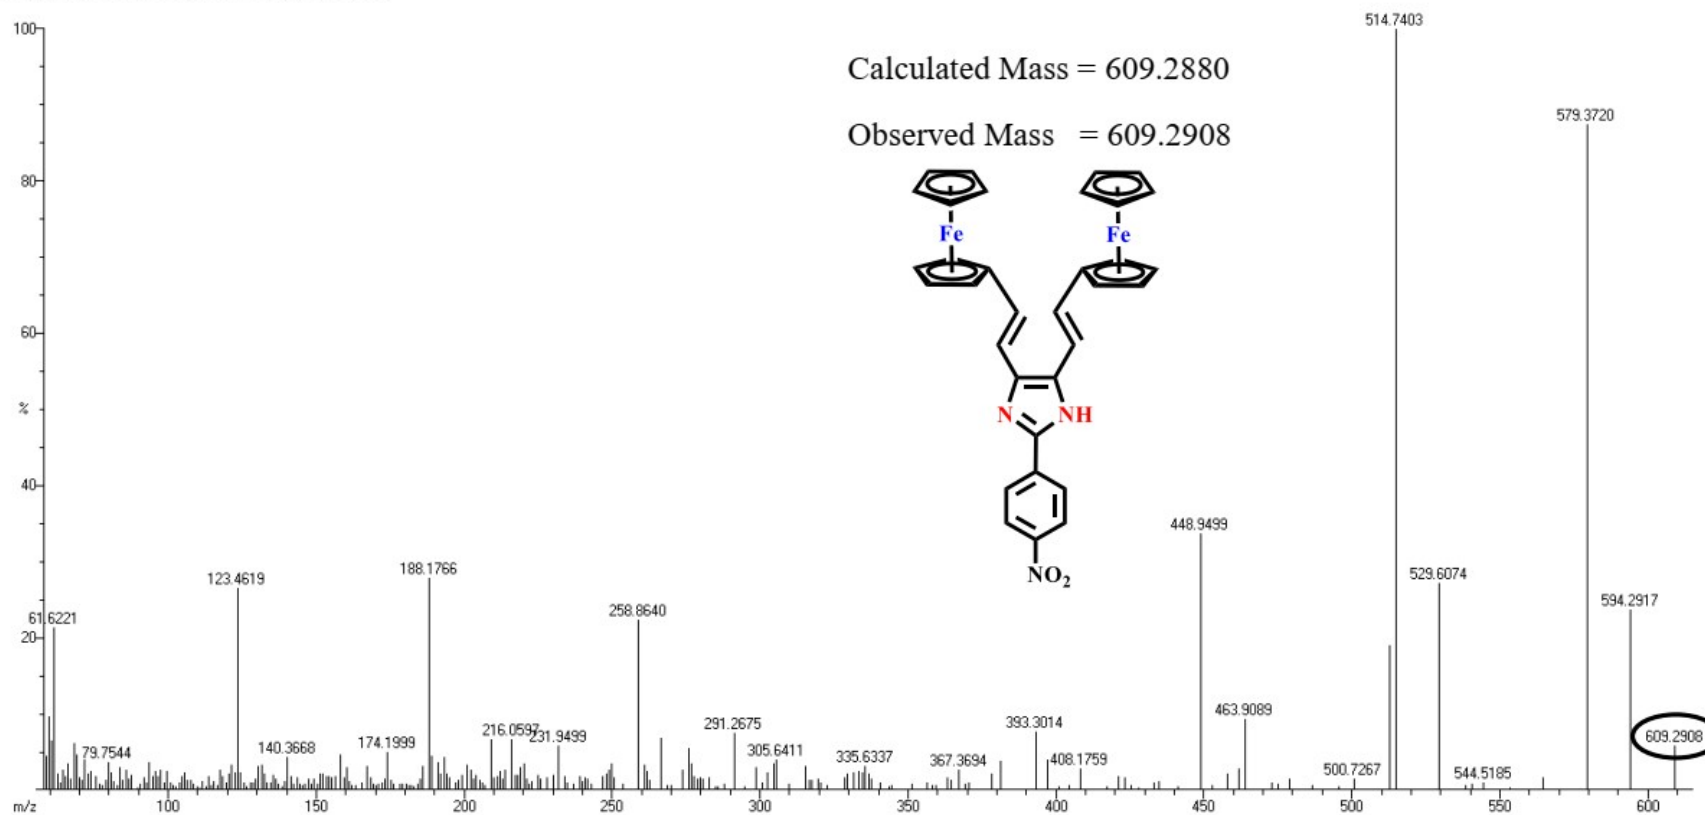

Figure S19. HRMS (EI) spectrum of compound 5(NO<sub>2</sub>)

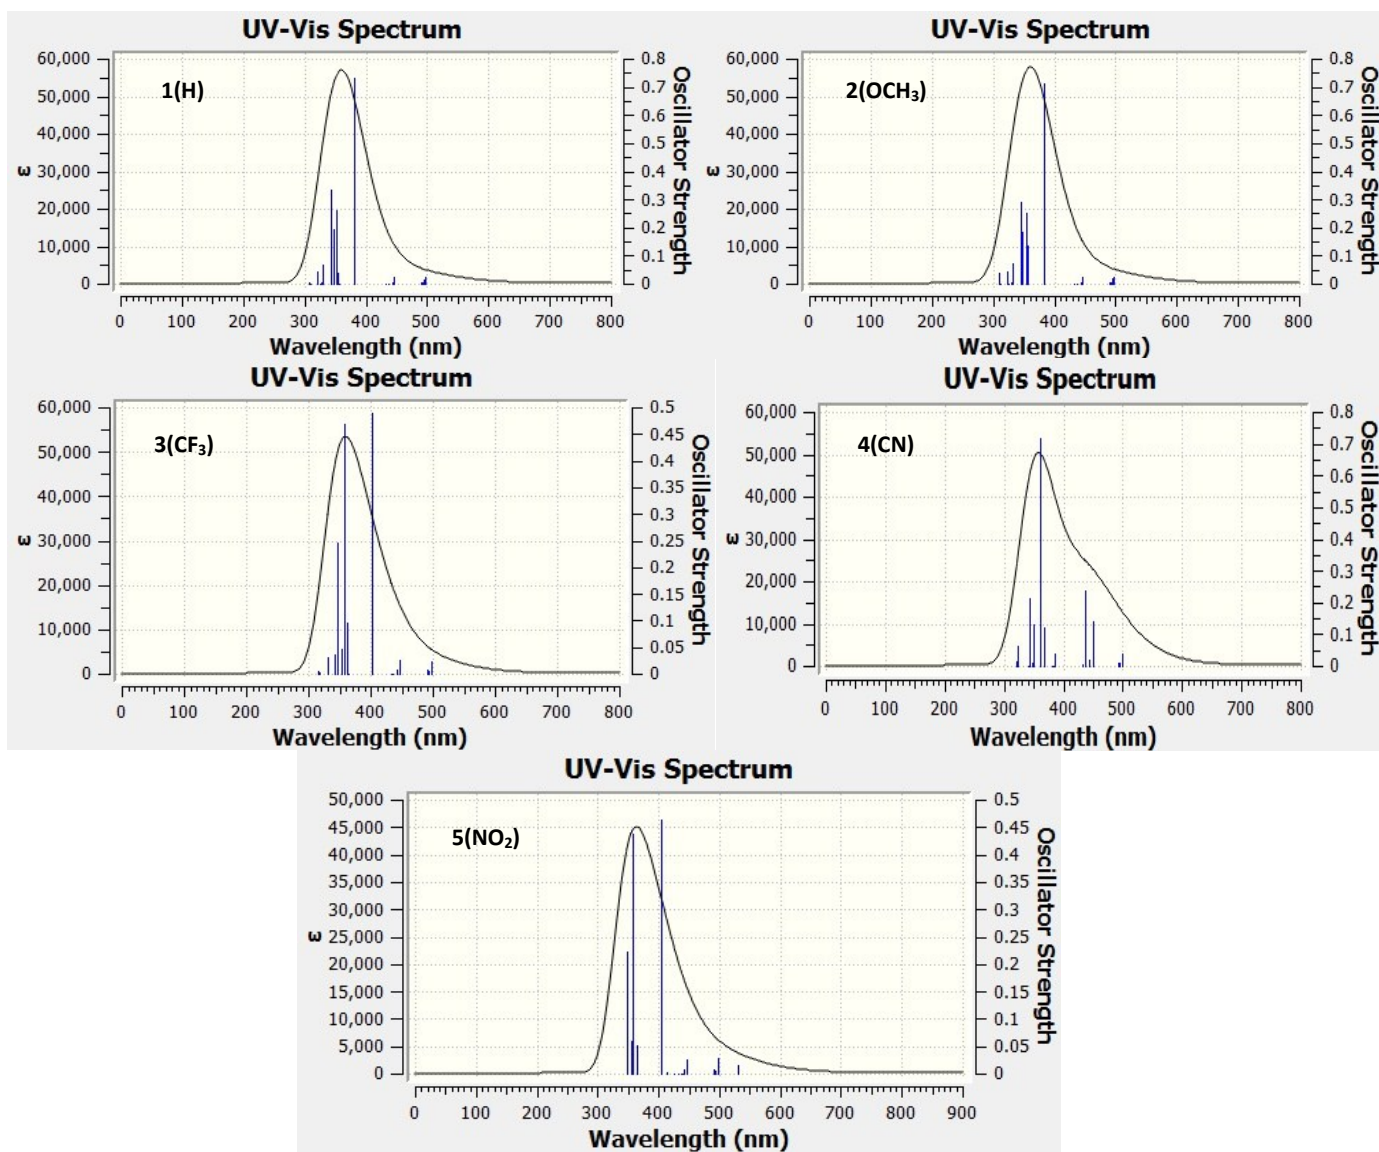

Figure S20. Theoretically calculated absorption spectra of chromophores 1-5. The absorption spectra were obtained by TD-DFT calculation with B3LYP/6-31+G\*\* level of theory. The spectra were visualized in GaussView 5.0

**Table S1.** Crystallographic data and structure refinement parameters of compound **4**

| <b>Identification code</b>                 | <b>Compound 4. Methanol</b>                                                                                                 |
|--------------------------------------------|-----------------------------------------------------------------------------------------------------------------------------|
| CCDC                                       | 1885673                                                                                                                     |
| Empirical formula                          | C <sub>35</sub> H <sub>32</sub> Fe <sub>2</sub> N <sub>3</sub> O <sub>1</sub>                                               |
| Formula weight                             | 621.33                                                                                                                      |
| Temperature, K                             | 298                                                                                                                         |
| Wavelength, Å                              | 0.71073                                                                                                                     |
| Crystal System                             | Orthorhombic                                                                                                                |
| Space group                                | Pbca                                                                                                                        |
| Unit cell dimensions                       | a = 21.827(2) Å<br>b = 11.6814(10) Å<br>c = 22.747(2) Å<br>$\alpha = 90^\circ$<br>$\beta = 90^\circ$<br>$\gamma = 90^\circ$ |
| Volume                                     | 5799.8(9) Å <sup>3</sup>                                                                                                    |
| Z                                          | 8                                                                                                                           |
| Calculated density (Mg/m <sup>3</sup> )    | 1.425                                                                                                                       |
| Absorption coefficient (mm <sup>-1</sup> ) | 1.034                                                                                                                       |
| F (000)                                    | 2576.0                                                                                                                      |
| Crystal size (mm <sup>3</sup> )            | 0.32 x 0.25 x 0.16                                                                                                          |
| Theta range for data collection (°)        | 1.79 to 28.51                                                                                                               |
| Reflections collected                      | 45309                                                                                                                       |
| Completeness to theta = 25.242             | 99.0 %                                                                                                                      |
| Max. and min. transmission                 | 0.741 and 0.848                                                                                                             |
| Goodness-of-fit on F <sup>2</sup>          | 0.863                                                                                                                       |
| Refinement method                          | Full-matrix least-squares on F <sup>2</sup>                                                                                 |
| Final R indices [ $I > 2\sigma(I)$ ]       | R <sub>1</sub> = 0.0550, wR <sub>2</sub> = 0.1634                                                                           |
| R indices (all data)                       | R <sub>1</sub> = 0.1330, wR <sub>2</sub> = 0.1884                                                                           |

**Table S2.** Cyclic voltammetry data and experimental HOMO, LUMO and optical band gap

| Chromophores      | $E_{pa}$<br>(mV) <sup>a</sup> | $E_{pc}$<br>(mV) <sup>a</sup> | $i_{pc}/i_{pa}$ | $E_{1/2}$<br>(mV) <sup>a</sup> | $\Delta E$<br>(mV) <sup>a</sup> | $E_{HOMO}$<br>(eV) <sup>a</sup> | $E_{LUMO}$<br>(eV) <sup>a</sup> | $\lambda^{onset}$<br>(nm) <sup>b</sup> | $E_g^{optical}$<br>(eV) <sup>c</sup> |
|-------------------|-------------------------------|-------------------------------|-----------------|--------------------------------|---------------------------------|---------------------------------|---------------------------------|----------------------------------------|--------------------------------------|
| <b>Compound 1</b> | 578                           | 439                           | 1.3             | 797                            | 139                             | -5.07                           | -1.81                           | 380                                    | 3.26                                 |
| <b>Compound 2</b> | 615                           | 490                           | 1.5             | 860                            | 125                             | -5.09                           | -1.81                           | 378                                    | 3.28                                 |
| <b>Compound 3</b> | 570                           | 420                           | 1.2             | 780                            | 150                             | -5.05                           | -1.85                           | 387                                    | 3.20                                 |
| <b>Compound 4</b> | 517                           | 403                           | 1.2             | 718                            | 114                             | -5.00                           | -1.80                           | 387                                    | 3.20                                 |
| <b>Compound 5</b> | 491                           | 408                           | 0.8             | 685                            | 083                             | -4.97                           | -1.89                           | 402                                    | 3.08                                 |

<sup>a</sup>Calculated as HOMO and LUMO level obtained from cyclic voltammetry using  $E_{HOMO} = -e(E_{ox}^{onset} + 4.4)$ .  $E_{optical}$  onset values obtained from oxidation peak in cyclic voltogram.  $E_{LUMO} = E_g^{optical} + E_{HOMO}$

<sup>b</sup>Calculated as  $\lambda^{onset}$  values from absorption spectra in  $CH_2Cl_2$  solvent.

<sup>c</sup>Calculated as optical band gap calculated from absorption onset/edge using the equation  $e(E_g^{optical}) = 1240/\lambda^{onset}$ .

**Table S3.** Selected transitions obtained from TD-DFT calculation with B3LYP/6-31+G\*\* level theory

| Entry                      | $\lambda$<br>(nm) | Oscillator strength, $f$ | Energy<br>(eV) | Selected Major Transitions <sup>a</sup>         |
|----------------------------|-------------------|--------------------------|----------------|-------------------------------------------------|
| <b>1 (H)</b>               | 380               | 0.7314                   | 3.25           | H → L (85%)                                     |
|                            | 352               | 0.2626                   | 3.51           | H → L+1 (38%)                                   |
|                            | 347               | 0.1952                   | 3.56           | H-2 → L (24%), H → L+1 (18%), H-5 → L+6 (17%)   |
|                            | 330               | 0.0679                   | 3.74           | H-1 → L (53%)                                   |
|                            | 321               | 0.0420                   | 3.85           | H-4 → L (53%)                                   |
|                            | 445               | 0.0222                   | 2.71           | H-3 → L+5 (29%), H-6 → L+4 (14%)                |
| <b>2 (OCH<sub>3</sub>)</b> | 382               | 0.7112                   | 3.23           | H → L (85%)                                     |
|                            | 344               | 0.2913                   | 3.59           | H → L+2 (18%)                                   |
|                            | 353               | 0.2518                   | 3.50           | H → L+2 (30%)                                   |
|                            | 347               | 0.1853                   | 3.56           | H-2 → L (24%), H-5 → L+6 (16%), H → L+1 (15%)   |
|                            | 332               | 0.0745                   | 3.72           | H-1 → L (53%)                                   |
|                            | 322               | 0.0450                   | 3.84           | H-4 → L (52%)                                   |
|                            | 310               | 0.0377                   | 3.99           | H → L+2 (91%)                                   |
| <b>3 (CF<sub>3</sub>)</b>  | 401               | 0.4888                   | 3.08           | H → L (89%)                                     |
|                            | 357               | 0.4683                   | 3.46           | H → L+1 (51%), H-1 → L (14%)                    |
|                            | 346               | 0.2454                   | 3.57           | H-4 → L (32%), H-2 → L (25%)                    |
|                            | 362               | 0.0963                   | 3.42           | H-1 → L (28%), H-3 → L+5 (13%)                  |
|                            | 352               | 0.0464                   | 3.51           | H-2 → L (62%)                                   |
|                            | 342               | 0.0375                   | 3.61           | H-3 → L+1 (31%), H-5 → L+6 (15%)                |
|                            | 331               | 0.0300                   | 3.74           | H-4 → L (31%)                                   |
|                            | 445               | 0.0260                   | 2.78           | H-3 → L+5 (30%)                                 |
| <b>4 (CN)</b>              | 360               | 0.7159                   | 3.44           | H → L+1 (65%)                                   |
|                            | 436               | 0.2386                   | 2.84           | H → L (50%)                                     |
|                            | 449               | 0.1413                   | 2.76           | H-3 → L+5 (30%), H → L+1 (26%), H-6 → L+8 (12%) |
|                            | 350               | 0.1308                   | 3.54           | H-1 → L+1 (31%), H-2 → L+6 (11%)                |



|                           |     |        |      |                                   |
|---------------------------|-----|--------|------|-----------------------------------|
|                           | 368 | 0.1228 | 3.36 | H-4 → L (74%)                     |
|                           | 322 | 0.0619 | 3.84 | H → L+2 (93%)                     |
|                           | 498 | 0.0222 | 2.48 | H-3 → L+3 (40%)                   |
|                           | 321 | 0.0152 | 3.85 | H-1 → L+1 (40%)                   |
| <b>5 (NO<sub>2</sub>)</b> | 404 | 0.4633 | 3.06 | H → L+1 (89%)                     |
|                           | 358 | 0.4372 | 3.45 | H → L+2 (51%)                     |
|                           | 347 | 0.2233 | 3.56 | H-5 → L (32%)                     |
|                           | 349 | 0.1743 | 3.55 | H-4 → L+1 (31%)                   |
|                           | 355 | 0.0584 | 3.48 | H-2 → L+1 (64%)                   |
|                           | 497 | 0.0290 | 2.49 | H-3 → L+6 (30%)                   |
|                           | 446 | 0.0260 | 2.77 | H-3 → L+7 (30%), H-5 → L+10 (14%) |

<sup>a</sup> H = HOMO; L = LUMO; only contributions above 10% are included.

**Table S4.** Density surfaces of the frontier orbitals involved in electronic transitions of chromophores **1-5** which is derived from B3LYP/6-31+G\*\* level of theory using isosurface value of 0.02 au.

| Orbitals | Compound 1                                                                          | Compound 2                                                                          | Compound 3                                                                            |
|----------|-------------------------------------------------------------------------------------|-------------------------------------------------------------------------------------|---------------------------------------------------------------------------------------|
| HOMO-4   | 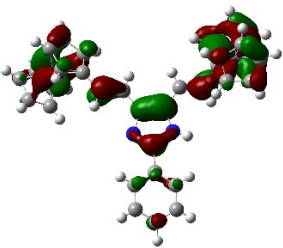  |   |   |
| HOMO-3   |  |  |  |
| HOMO-2   |  |  |  |

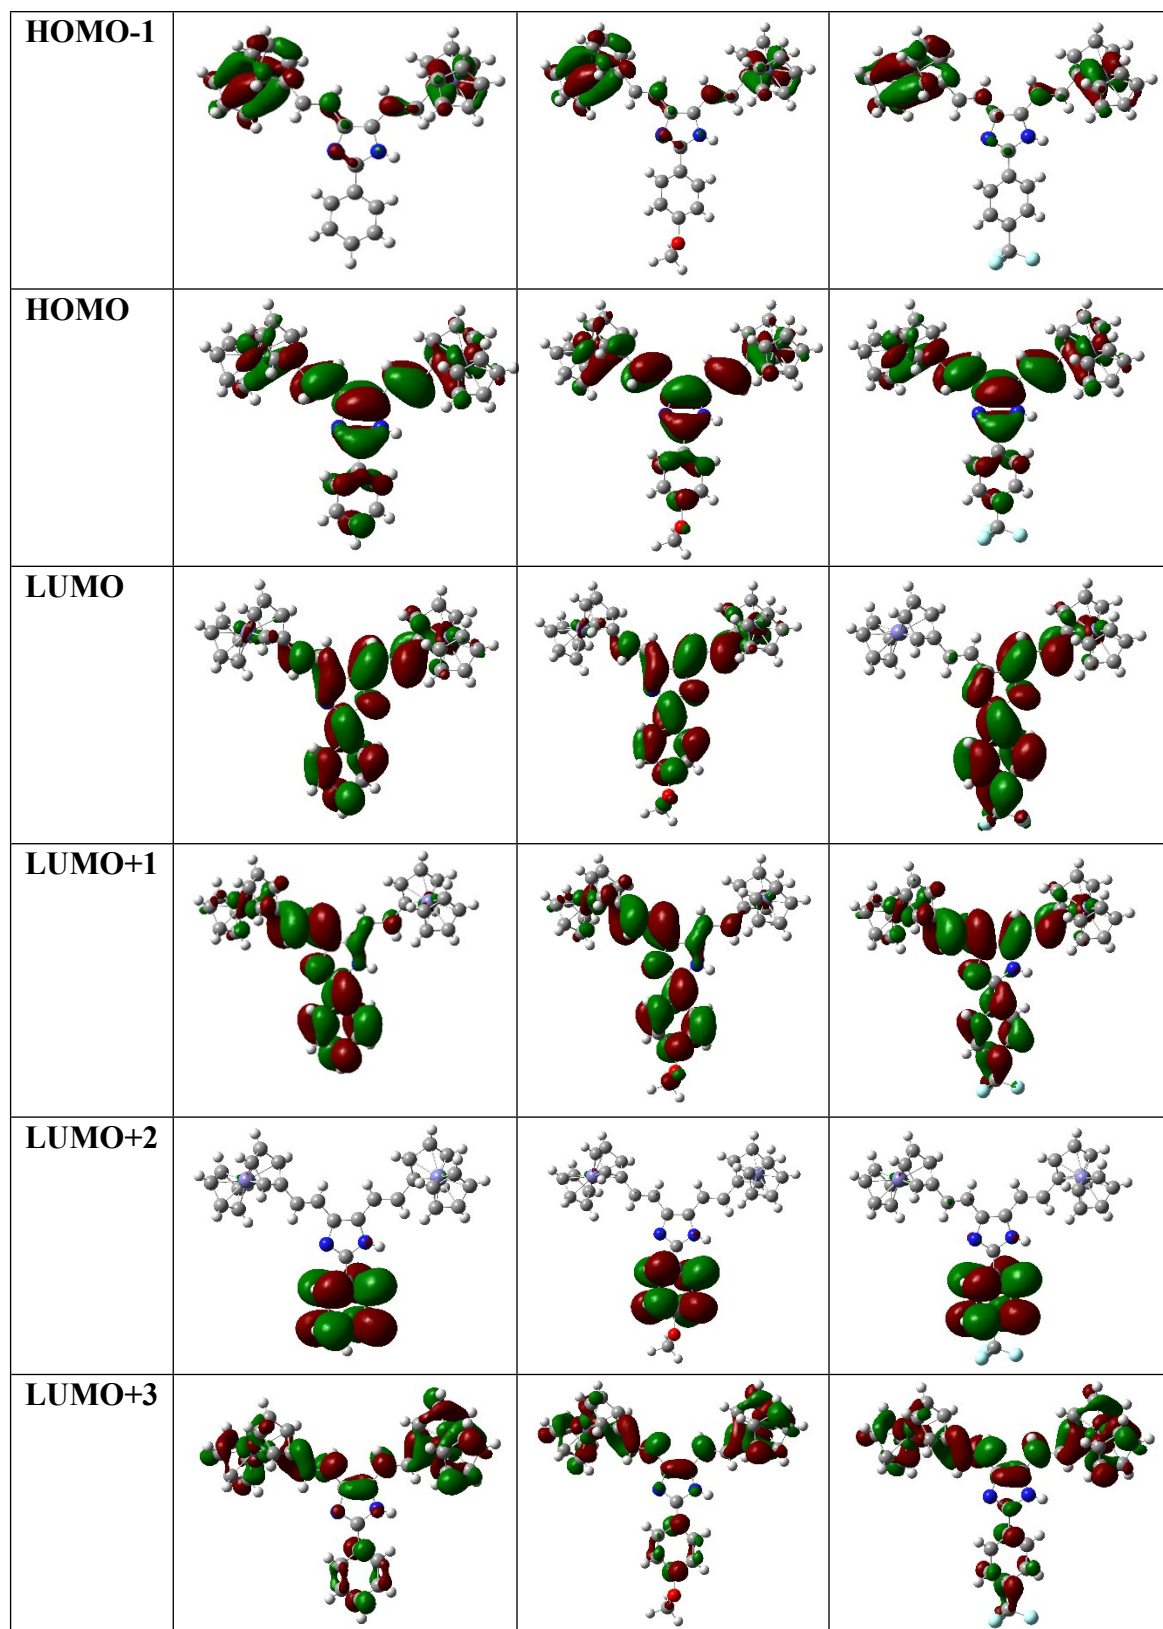

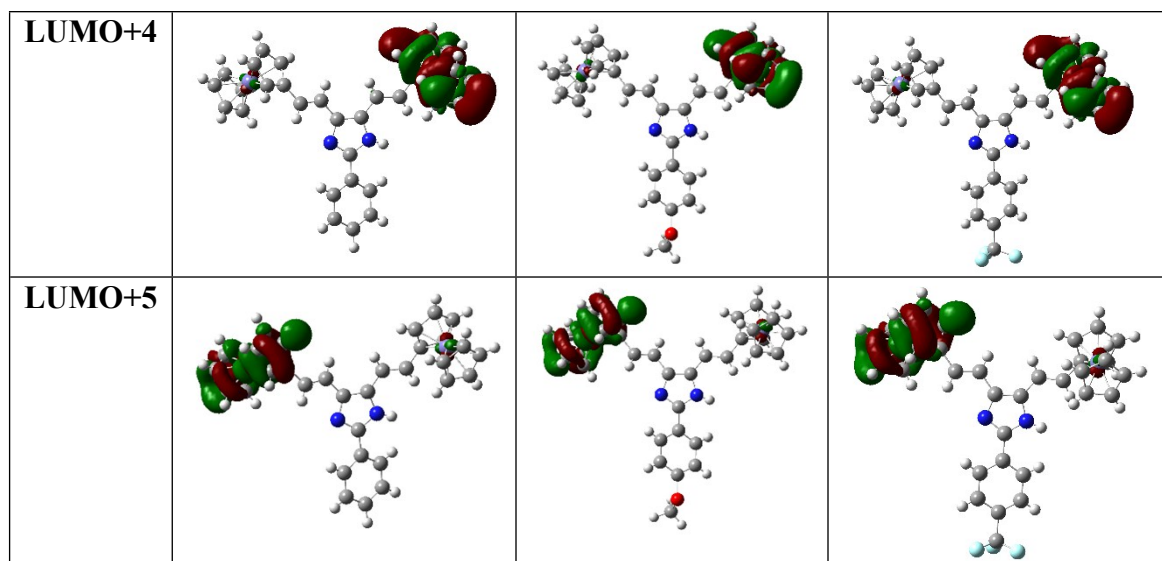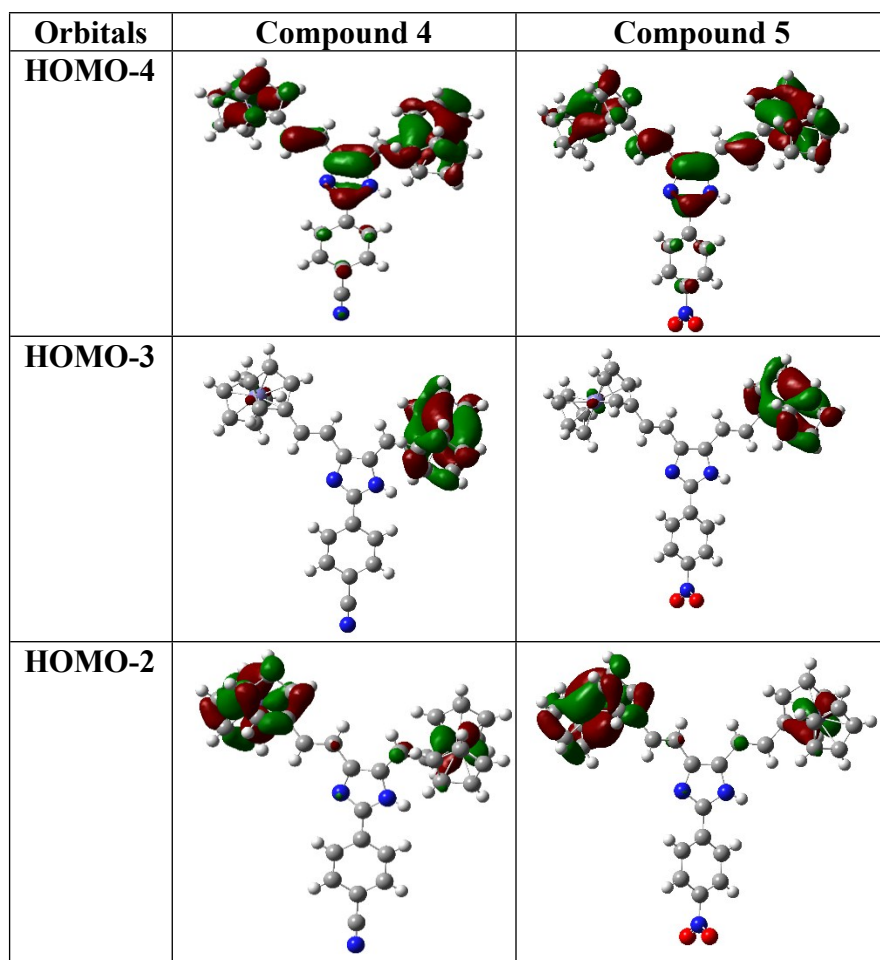

|        |                                                                                     |                                                                                      |
|--------|-------------------------------------------------------------------------------------|--------------------------------------------------------------------------------------|
| HOMO-1 | 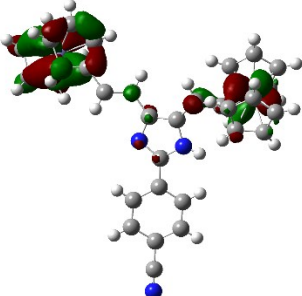   |    |
| HOMO   |    |    |
| LUMO   |   |   |
| LUMO+1 |  |  |
| LUMO+2 |  |  |

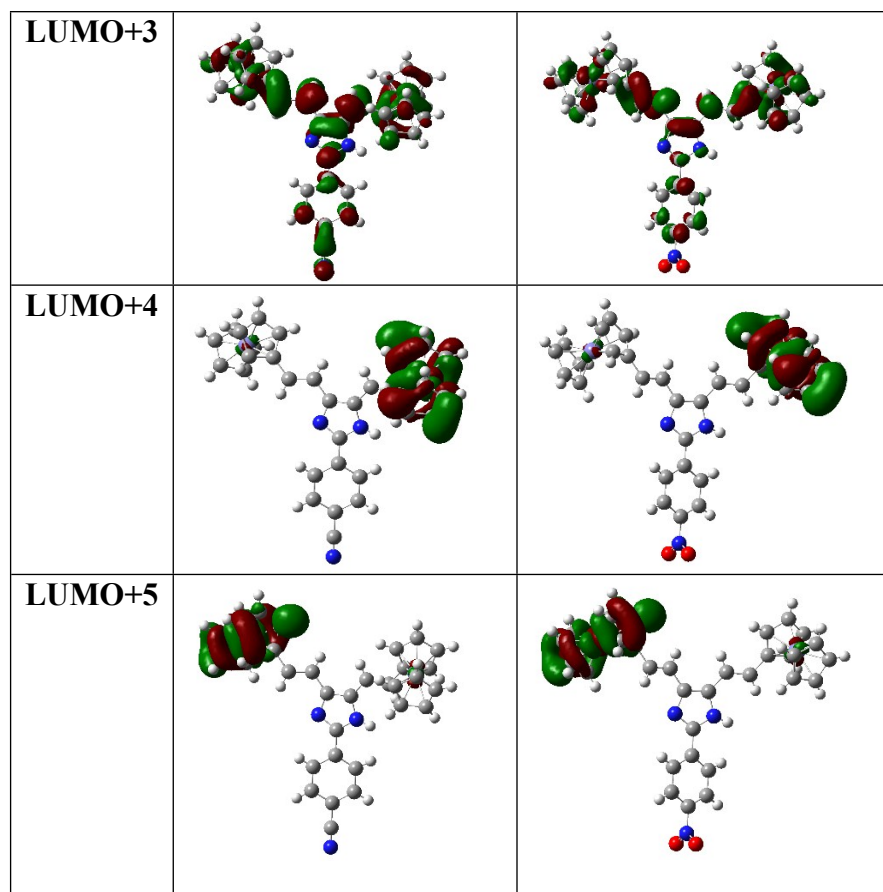

Supplement: c9dt03637g1.pdf [file c9dt03637g1.pdf]
